# Supplementary material
Source: PubMed Central journal article supplement (PMC3890702)
Supplement: tlo0606_0676SD1.pdf [file tlo0606_0676SD1.pdf]

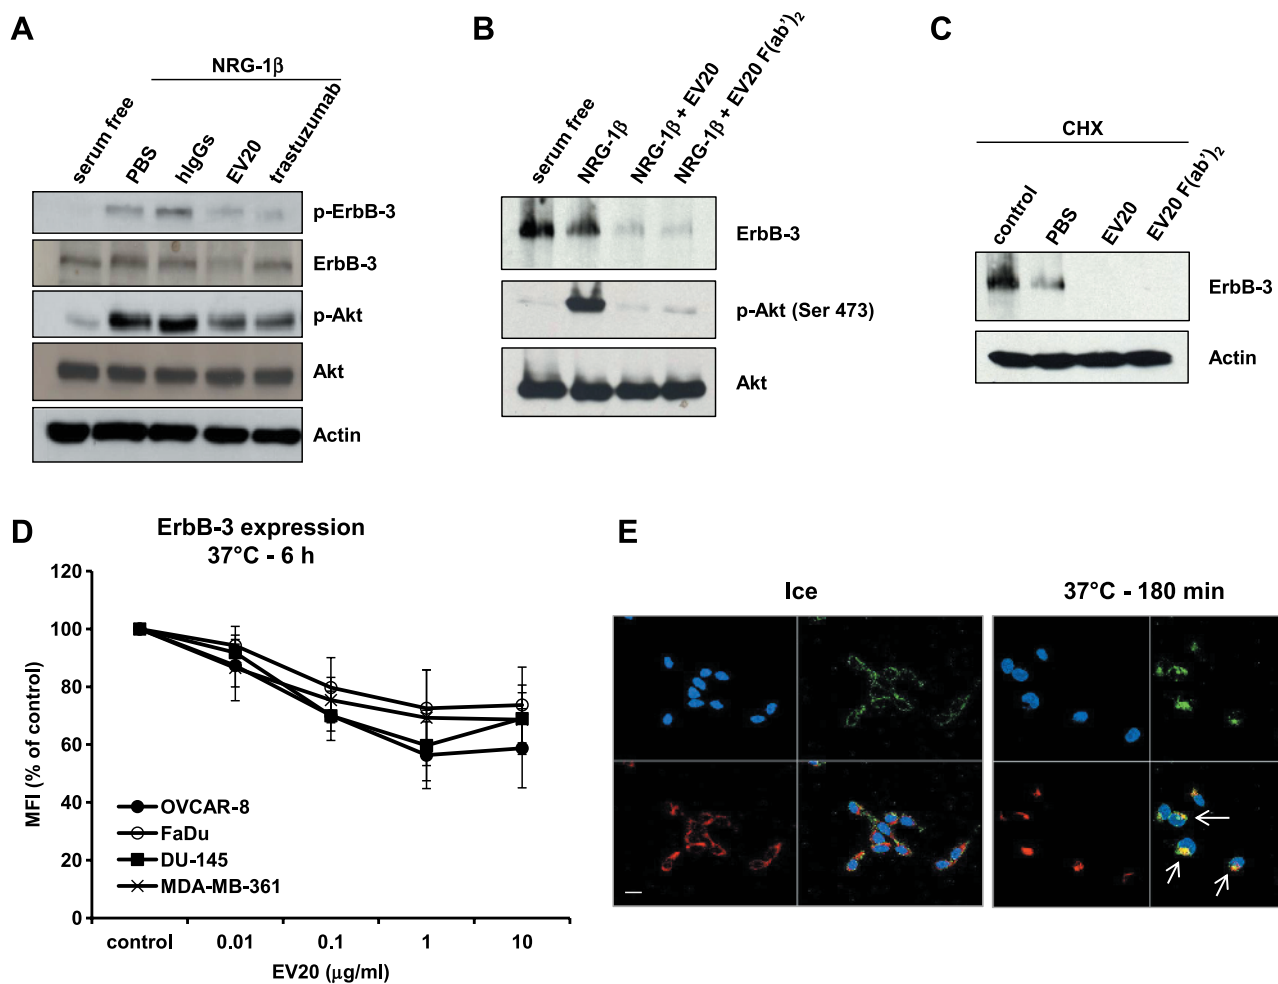

**Figure W1.** (A) After 24 hours of serum deprivation, OVCAR-8 cells were treated for 2 hours as indicated before ligand stimulation (5 minutes). hlgGs and trastuzumab were used as negative and positive control antibodies, respectively. (B) Serum-starved (24-hour) IR-8 cells were incubated with the FL EV20 or F(ab')<sub>2</sub> truncated form for 2 hours before NRG-1 $\beta$  stimulation. Cell lysates were immunoblotted as indicated. (C) IR-8 cells were incubated for 3 hours with CHX in the presence or absence of FL EV20 or F(ab')<sub>2</sub> truncated form. Cell lysates were immunoblotted as indicated. (D) Cells were exposed to increasing doses of EV20 for 6 hours and then analyzed for surface ErbB-3 expression by FACS. Plotted results are an average  $\pm$  SD of three independent experiments. (E) IR-8 cells were treated with 10  $\mu$ g/ml EV20, kept on ice for 30 minutes, and then returned at 37°C for 180 minutes. After harvesting, cells were fixed, permeabilized, and then incubated with the rabbit antibody C-17 recognizing the C-terminal residue of ErbB-3. Secondary goat anti-human and anti-rabbit antibodies were used to visualize EV20 (green) and ErbB-3 (red). Cell nuclei are shown in blue. Bar, 10  $\mu$ m.

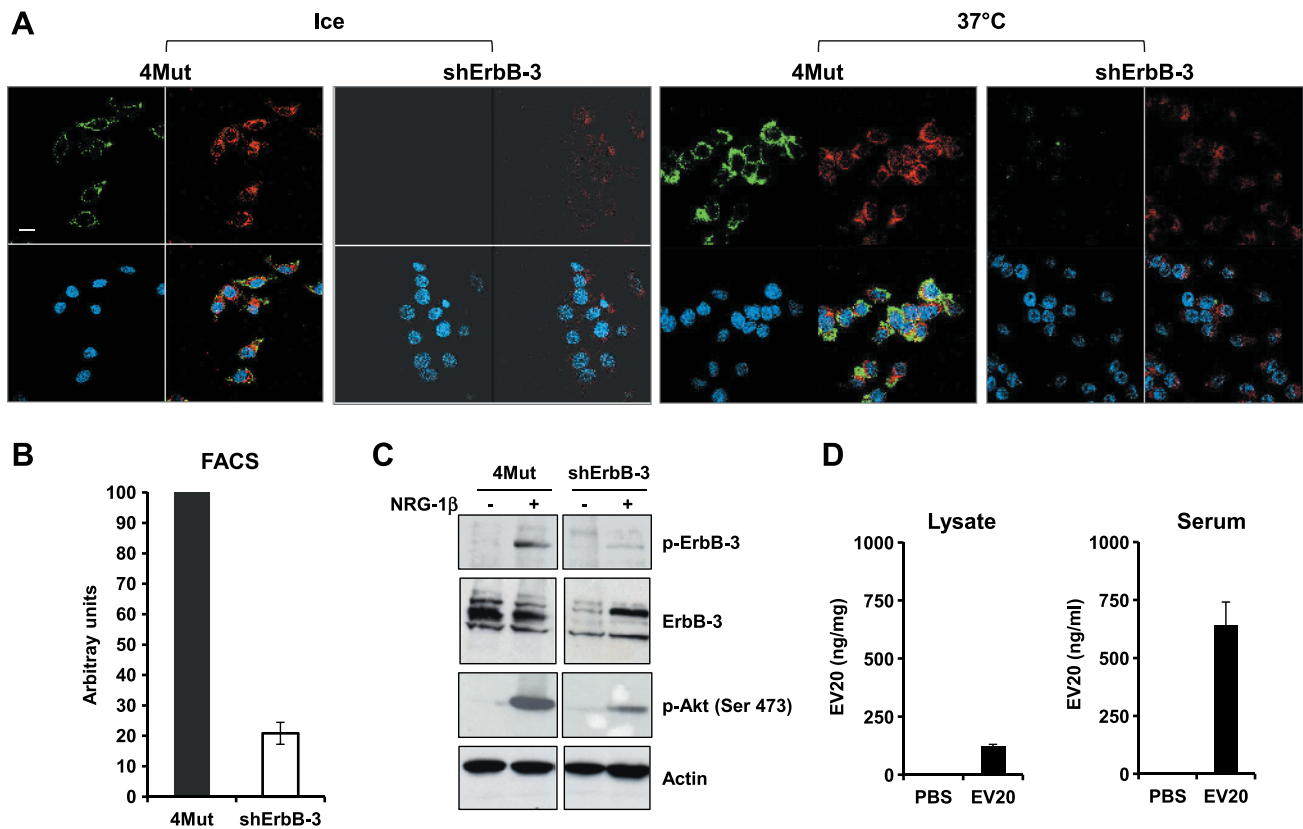

**Figure W2.** (A) Control 4Mut and shErbB-3 IR-8 cells were maintained on ice for 30 minutes in the presence of 10  $\mu$ g/ml EV20 and returned at 37°C for 60 minutes. EV20 and ErbB-3 receptor were visualized in green and red, respectively. Cell nuclei are shown in blue. Bar, 10  $\mu$ m. (B) Control and shErbB-3 IR-8 cells were analyzed by FACS for ErbB-3 expression. Plotted results are an average  $\pm$  SD of three independent experiments. (C) Control and shErbB-3 IR-8 cells were serum starved for 24 hours and then stimulated with 10 ng/ml NRG-1 $\beta$  for 5 minutes. Cell lysates were then probed with the indicated antibodies. (D) ELISA for determination of EV20 concentration in serum (left) and tumor tissue (right) of mice 24 hours after antibody injection.
